# Supplementary material for: In vitro growth and carbon utilization of the green-leaved orchid Dendrobium officinale are promoted by mycorrhizal associations
Source: PubMed Central journal article supplement (PMC5430334; doi:10.1186/1999-3110-54-23), 2013-08-28

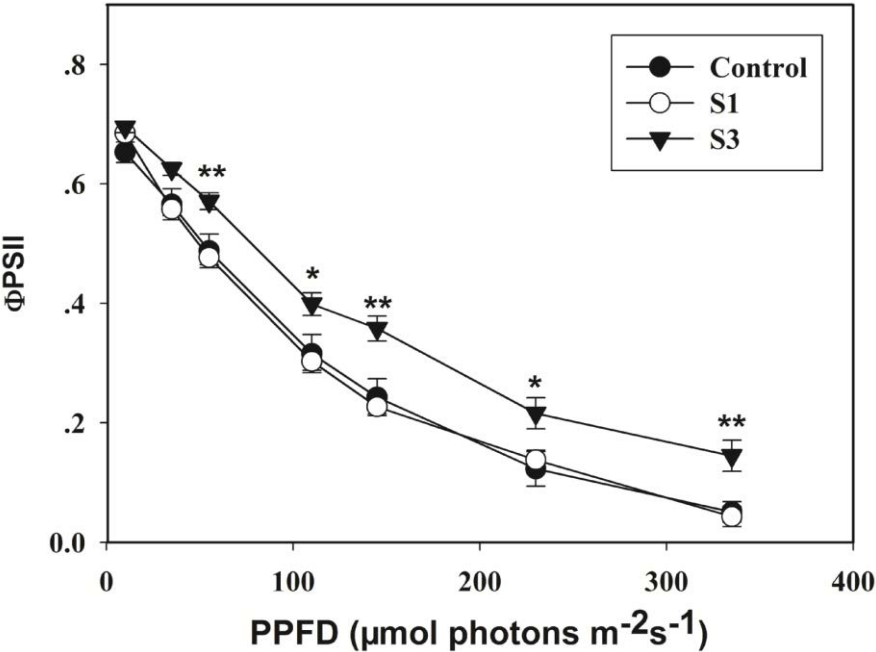

Supplement: 40529_2013_93_MOESM3_ESM.pdf [file 40529_2013_93_MOESM3_ESM.pdf]
